# Supplementary material for: Follistatin modulates a BMP autoregulatory loop to control the size and patterning of sensory domains in the developing tongue
Source: Oxford University Press journal article supplement (doi:10.1242/dev.030544), 2009-05-28
Supplement: dev030544tables1.pdf [file dev030544tables1.pdf]

**Table S1. Summary of phenotypes observed in tongues of *Fst*<sup>-/-</sup> versus wild-type mice**

| Anterior tongue (fungiform/filiform papillae)                                                     |                                                           | Posterior tongue (intermolar eminence)                                       |                                                                     |
|---------------------------------------------------------------------------------------------------|-----------------------------------------------------------|------------------------------------------------------------------------------|---------------------------------------------------------------------|
| Wild type                                                                                         | <i>Fst</i> <sup>-/-</sup>                                 | Wild type                                                                    | <i>Fst</i> <sup>-/-</sup>                                           |
| Filiform papillae develop normally                                                                | Filiform papillae develop normally                        | Filiform papillae develop normally                                           | No filiform papillae develop                                        |
| Clear demarcation of epithelial-mesenchymal border                                                | Dysplastic epithelial-mesenchymal border                  | Clear demarcation of epithelial-mesenchymal border                           | Dysplastic epithelial-mesenchymal border                            |
| <i>Sox2</i> expressed in developing taste placode/taste bud                                       | Excess and ectopic <i>Sox2</i> -positive domains          | <i>Sox2</i> not expressed                                                    | Ectopic <i>Sox2</i> -expressing domains                             |
| Distinct patterning of papillae on anterior 2/3 of the tongue                                     | Abnormal size and disrupted spacing of fungiform papillae | Filiform papillae only                                                       | Ectopic fungiform papillae-like structures                          |
| Wnt activity in developing taste placode/taste bud                                                | Decreased Wnt activity                                    | Wnt activity in filiform papillae only                                       | Wnt activity in ectopic fungiform papillae-like structures          |
| <i>Shh</i> expressed in developing taste placode/taste bud                                        | Decreased <i>Shh</i> expression                           | <i>Shh</i> is not expressed                                                  | <i>Shh</i> expression in ectopic fungiform papillae-like structures |
| Fungiform papillae are innervated by projecting nerve fibers stained by PGP9.5                    | Normally is innervated                                    | No visible innervation by PGP9.5 staining                                    | Ectopic fungiform papillae-like structures are innervated           |
| Gustducin expressed in taste receptor cells of the taste bud at postnatal stages                  | Premature gustducin expression                            | Gustducin is not expressed                                                   | Gustducin expression in ectopic fungiform papillae-like structures  |
| <i>Bmp7</i> expressed in developing taste placode/taste bud                                       | Expansion of <i>Bmp7</i> expression domains               | <i>Bmp7</i> is not expressed                                                 | Ectopic expression of <i>Bmp7</i>                                   |
| Proliferating cells are concentrated along the epithelial-mesenchymal border and in the taste bud | No change in cell proliferation                           | Proliferating cells are concentrated along the epithelial-mesenchymal border | No change in cell proliferation                                     |
