# Supplementary figures and images for: Follistatin modulates a BMP autoregulatory loop to control the size and patterning of sensory domains in the developing tongue
Source: Oxford University Press journal article supplement (doi:10.1242/dev.030544), 2009-05-28

Ant

Wildtype

*Fst*<sup>-/-</sup>

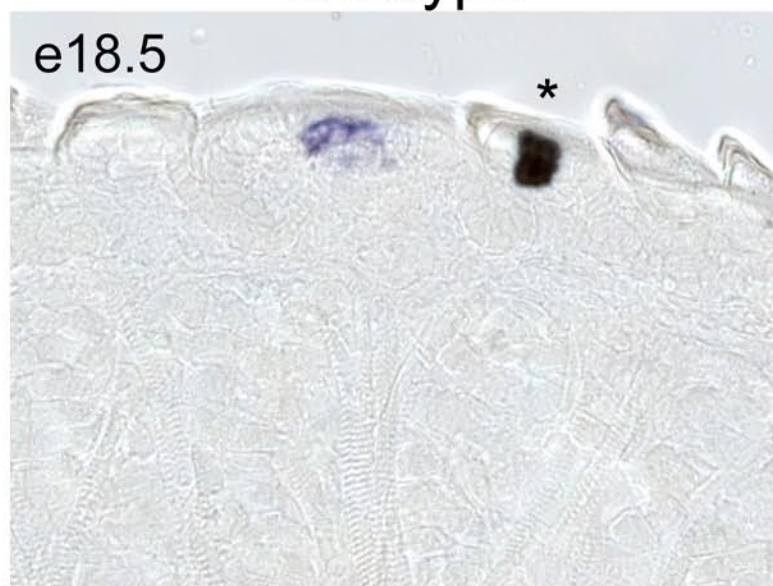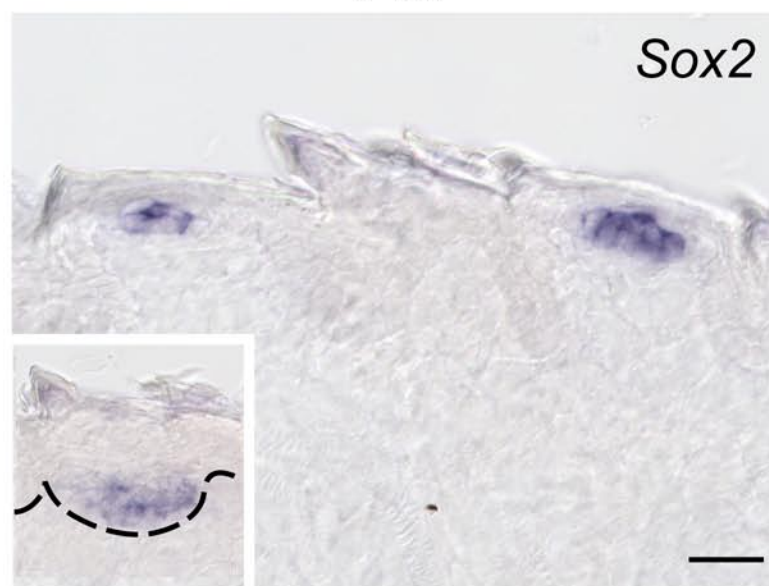

IE

Wildtype

*Fst*<sup>-/-</sup>

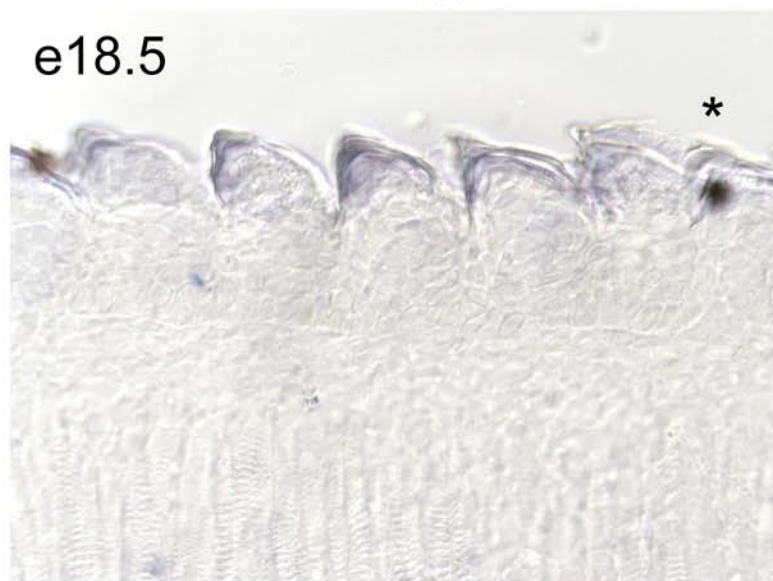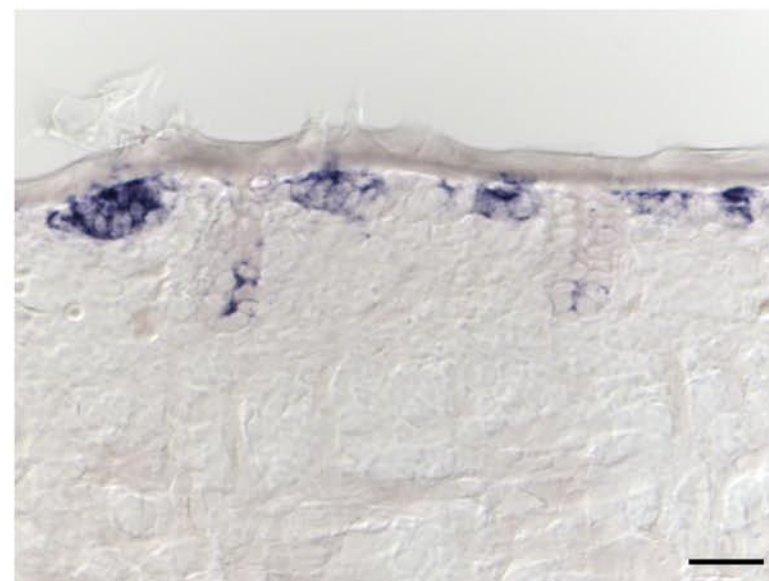

Supplement: dev030544-sup-030544-figs1.pdf [file dev030544-sup-030544-figs1.pdf]

**A**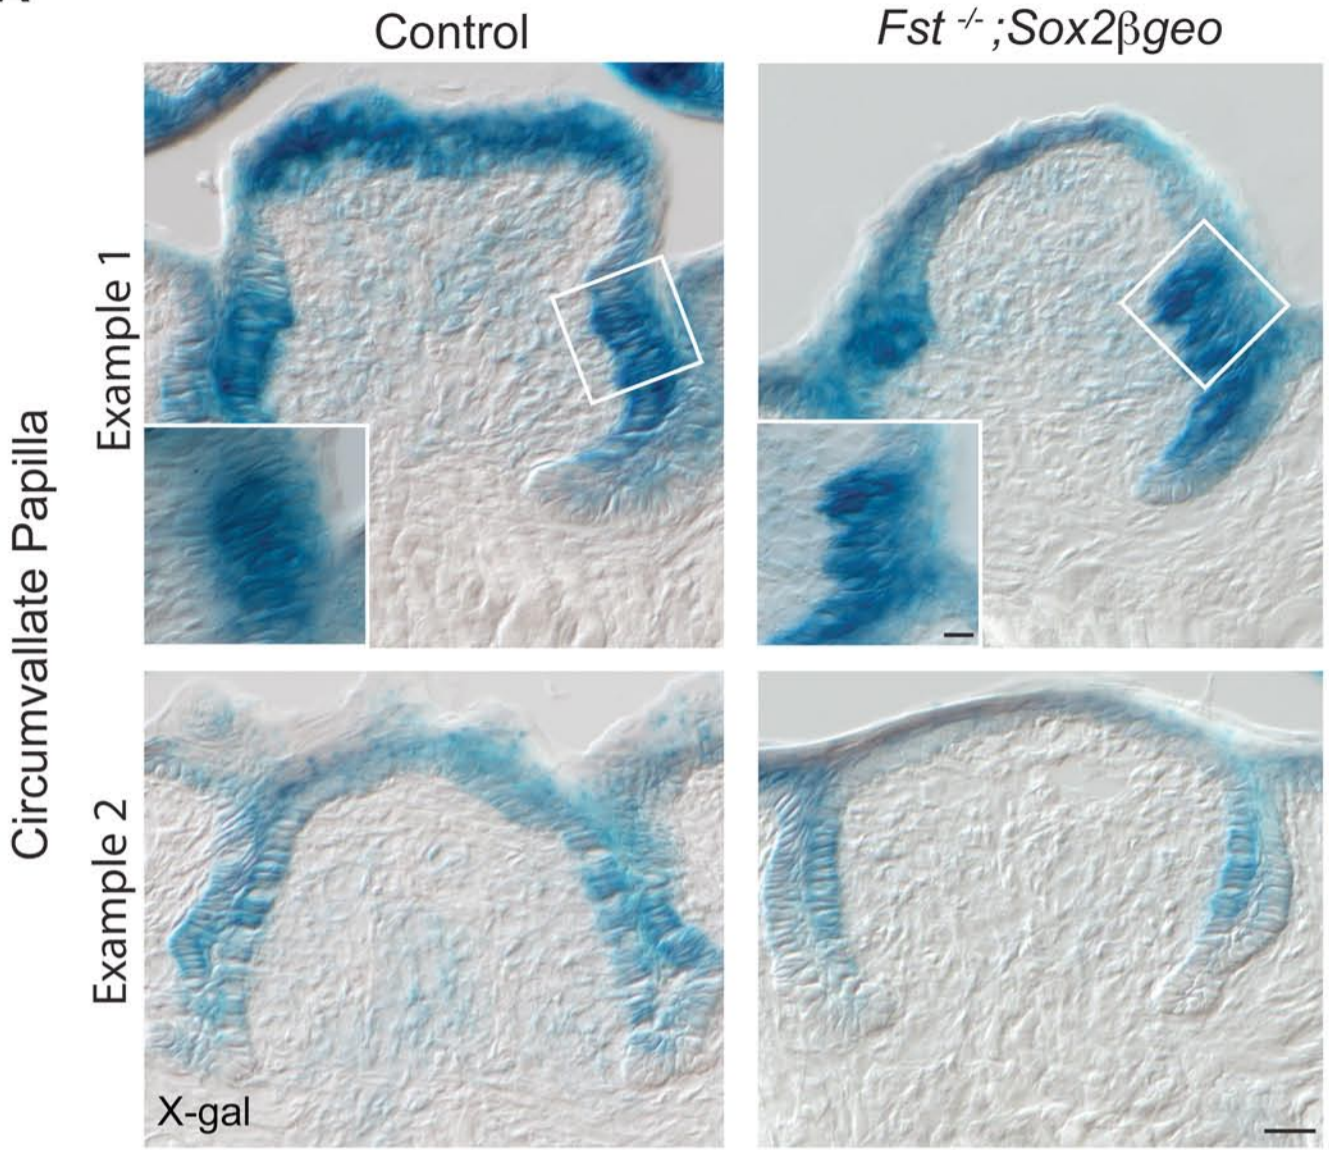**B**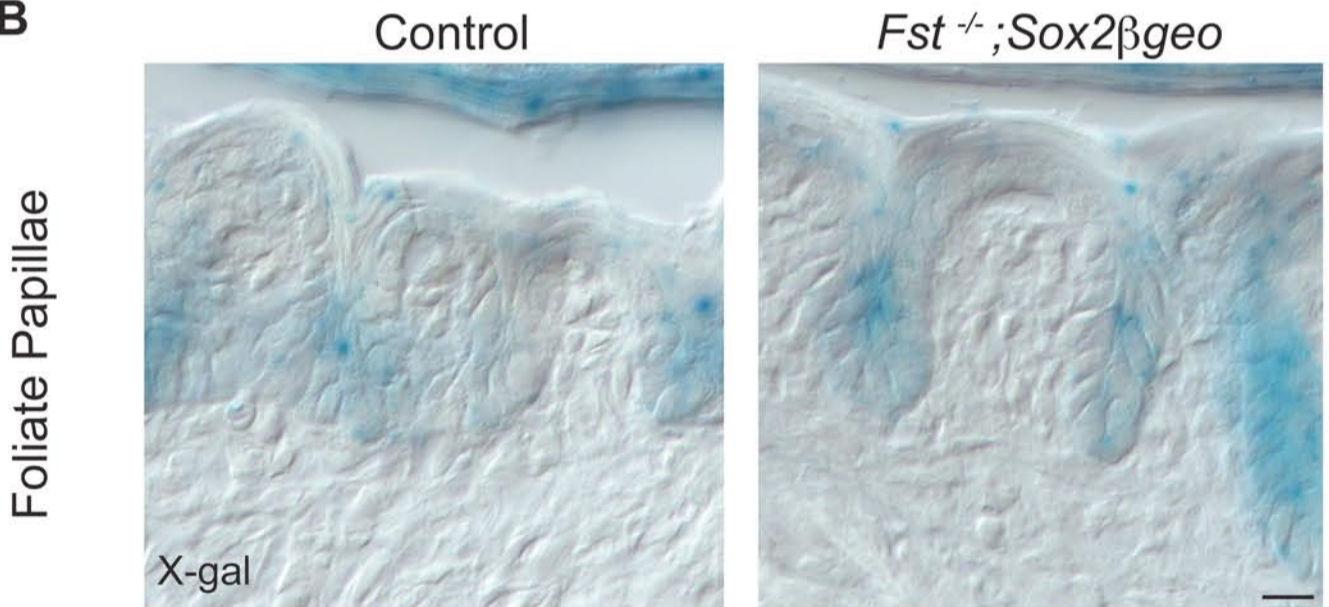**C**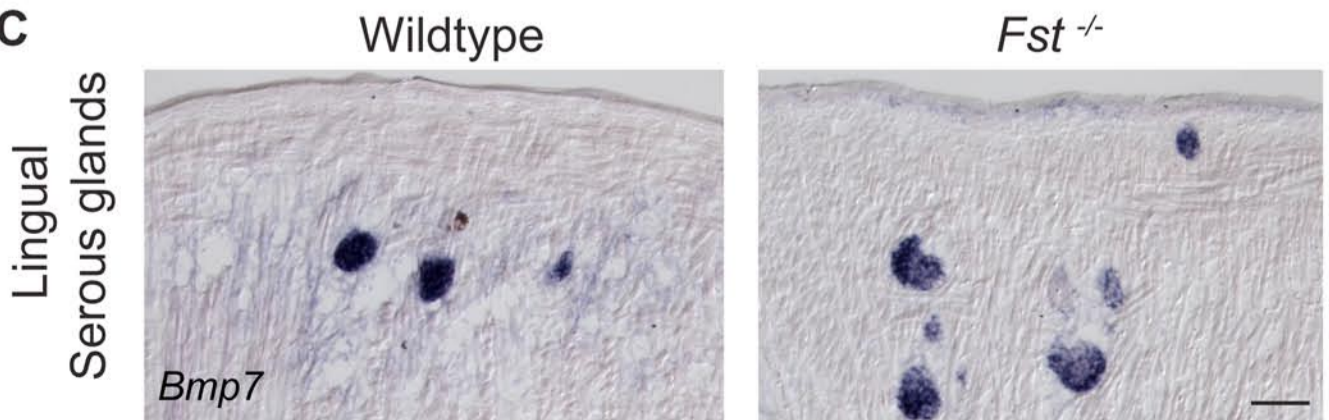

Supplement: dev030544-sup-030544-figs2.pdf [file dev030544-sup-030544-figs2.pdf]

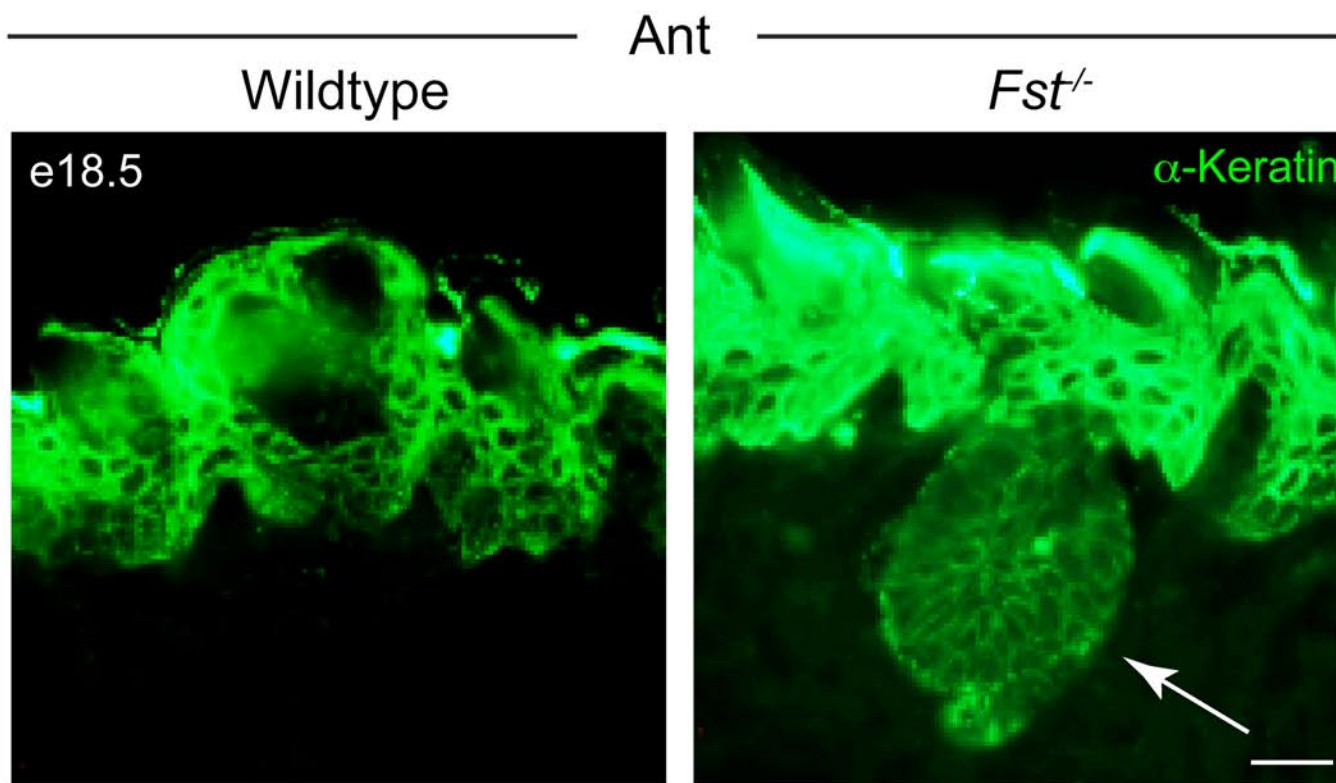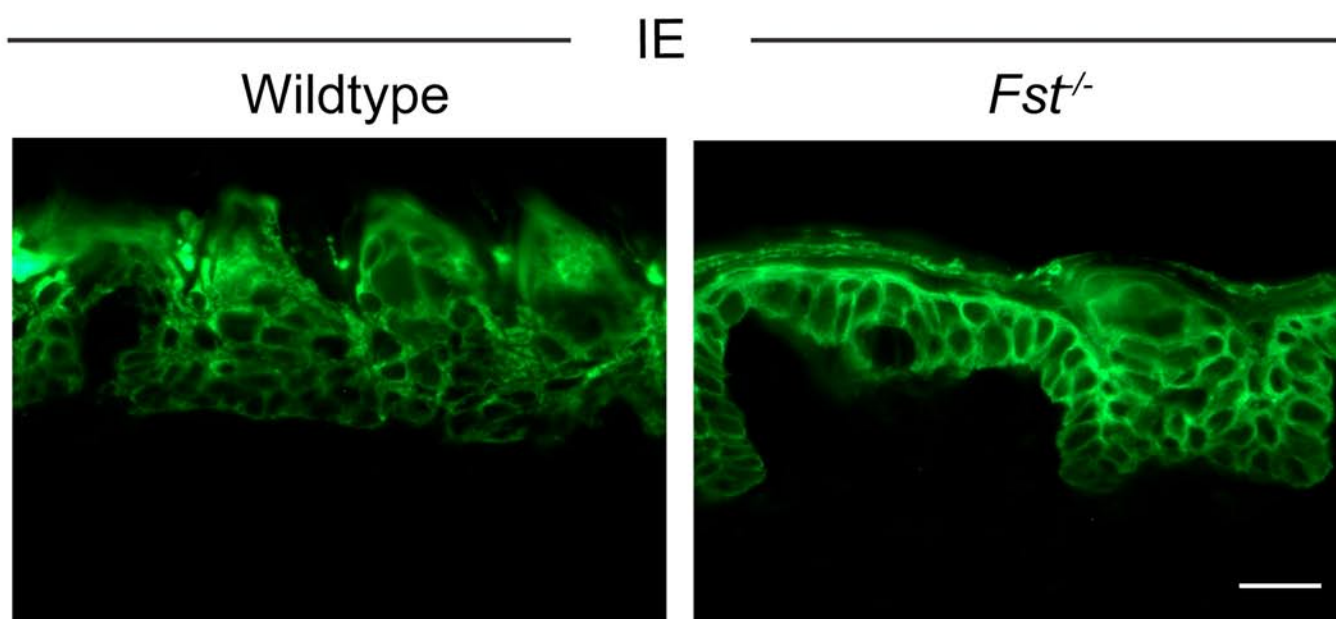

Supplement: dev030544-sup-030544-figs3.pdf [file dev030544-sup-030544-figs3.pdf]

**A**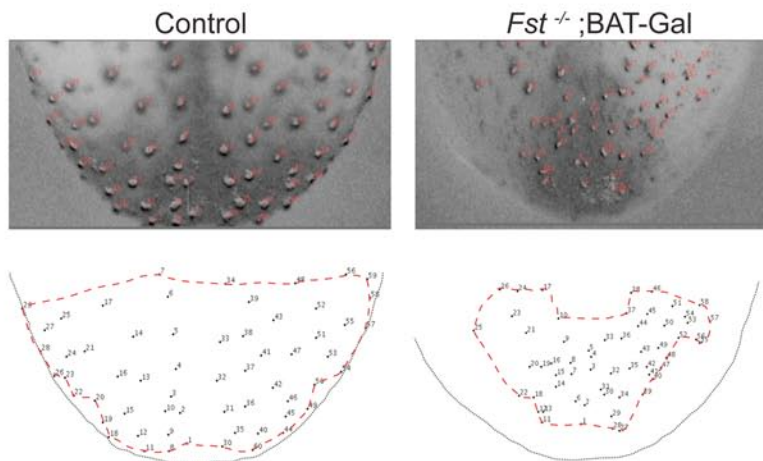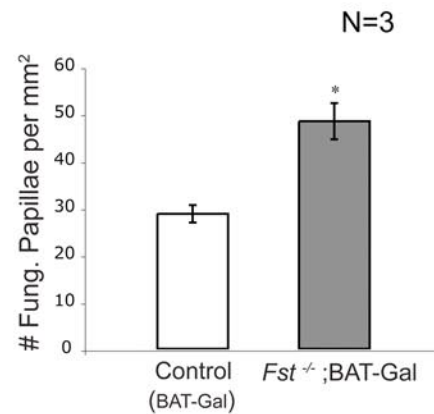**B**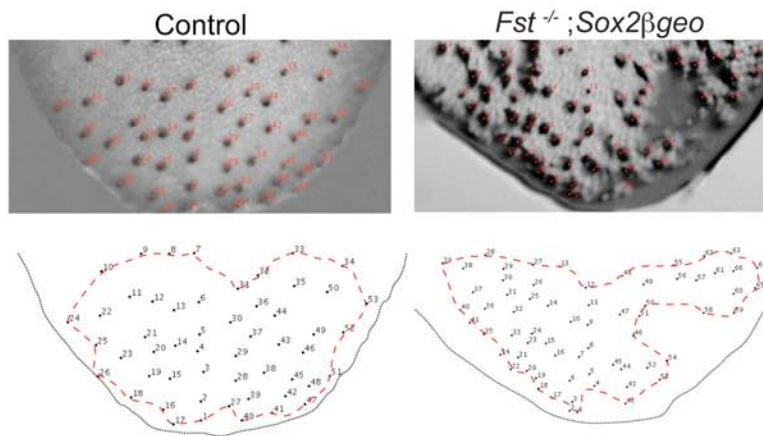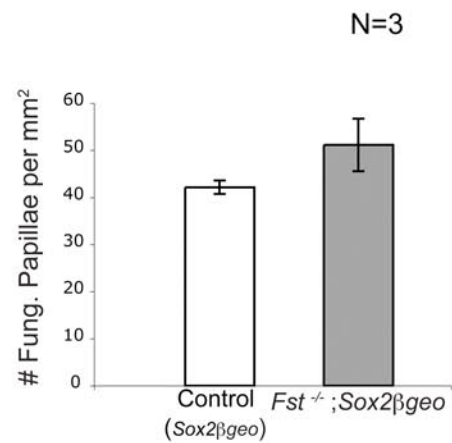

Supplement: dev030544-sup-030544-figs4.pdf [file dev030544-sup-030544-figs4.pdf]

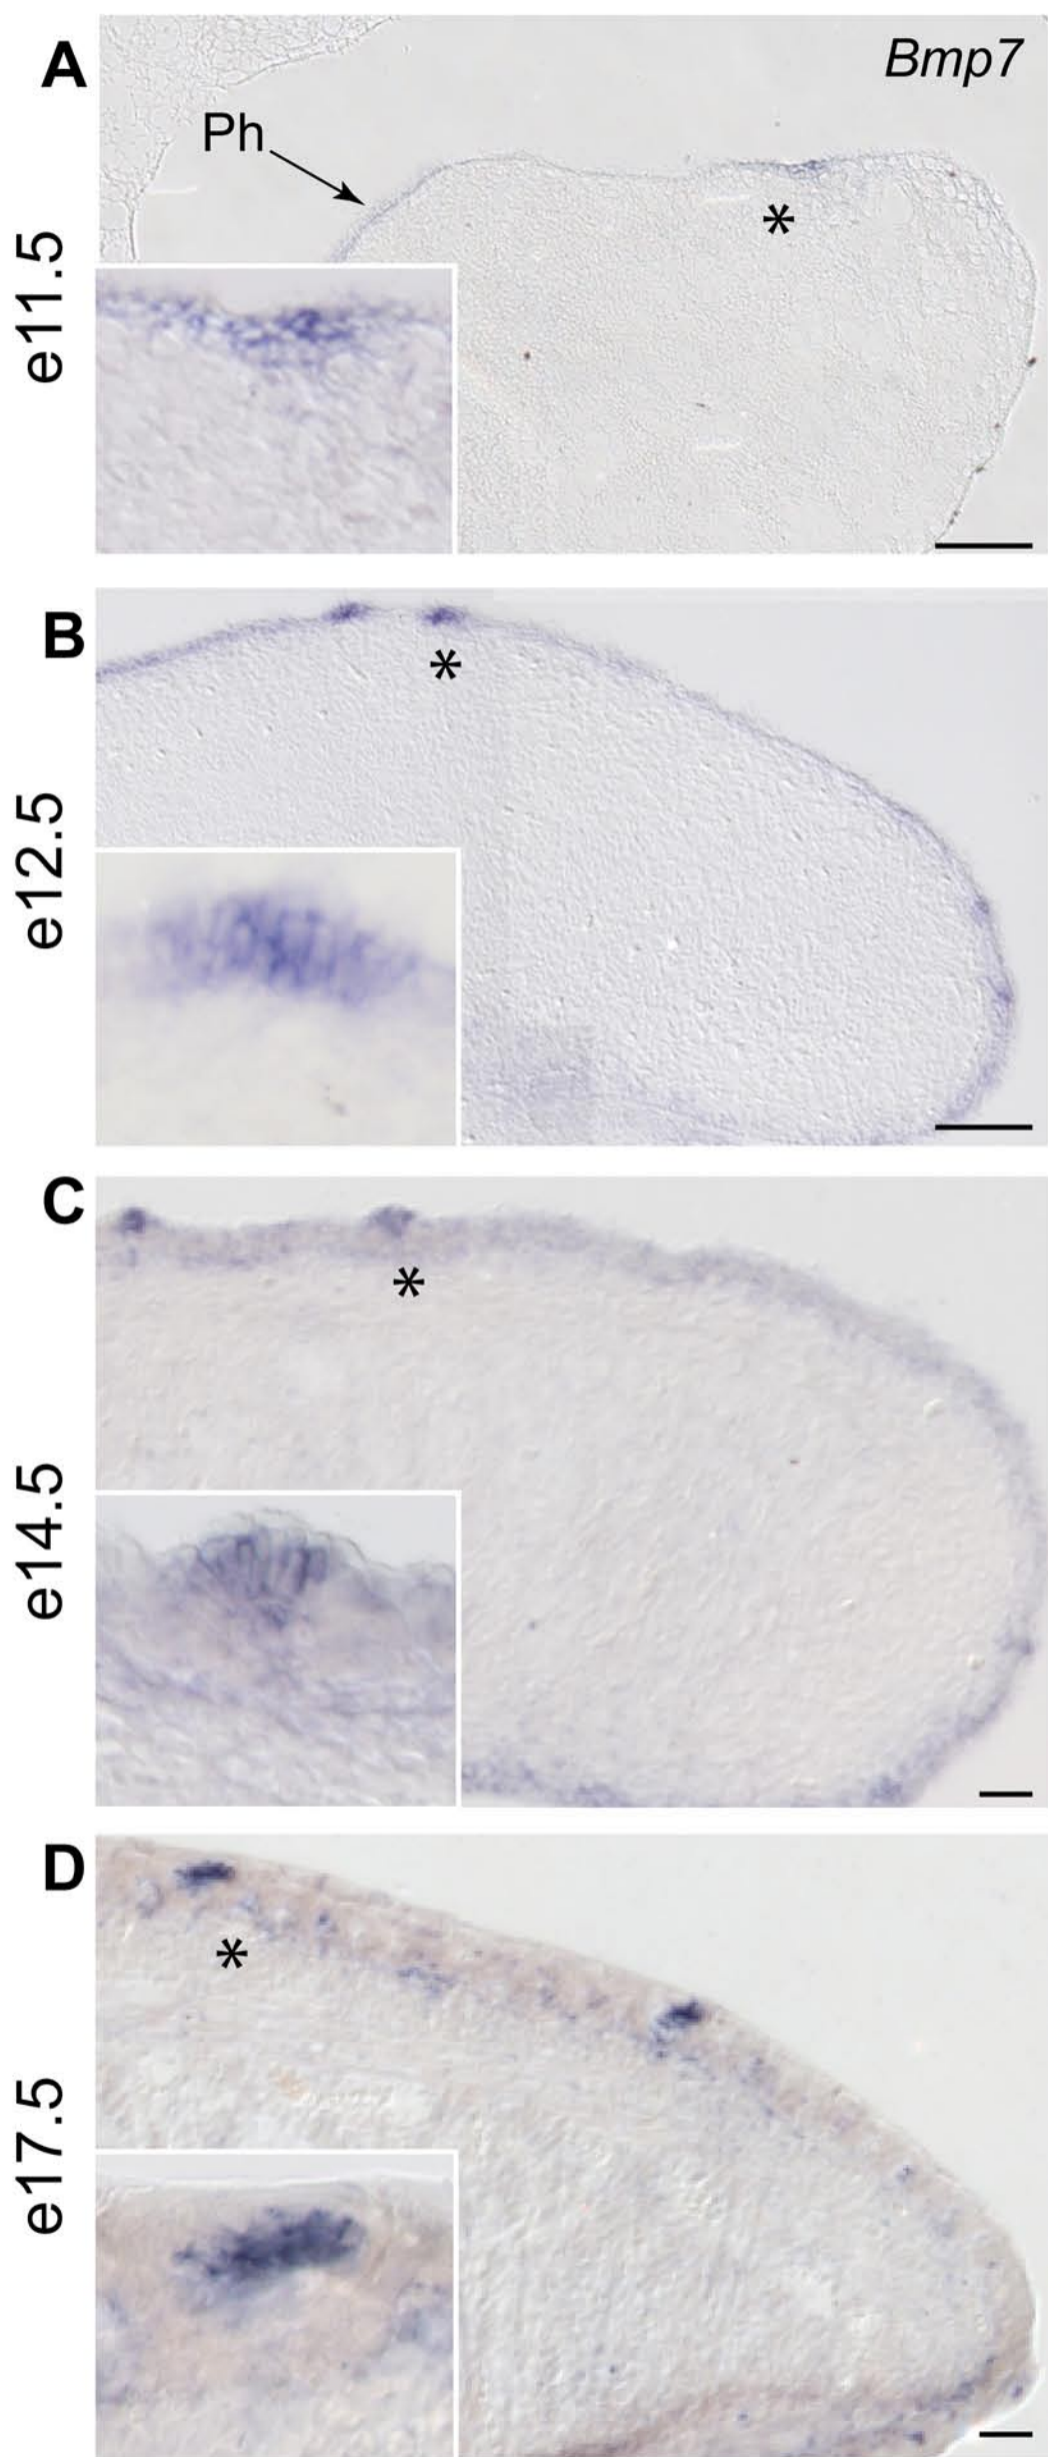

Supplement: dev030544-sup-030544-figs5.pdf [file dev030544-sup-030544-figs5.pdf]

**A**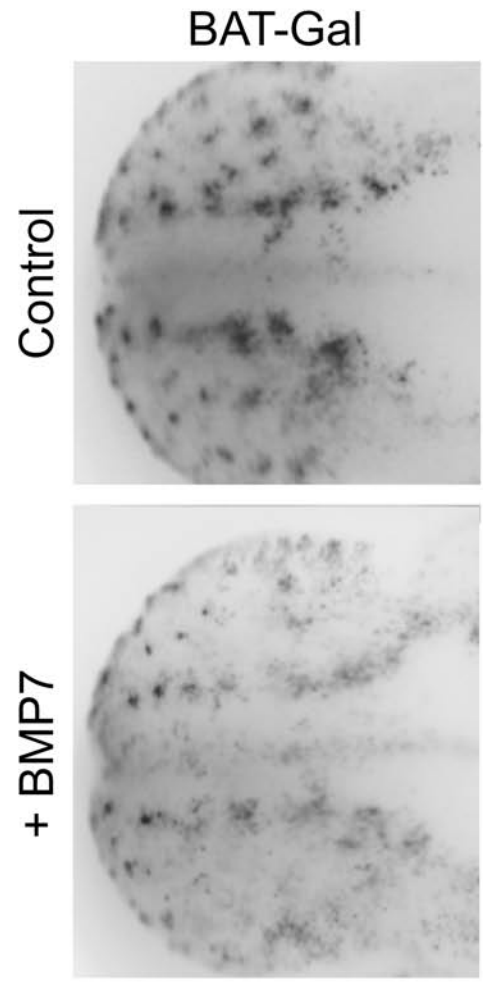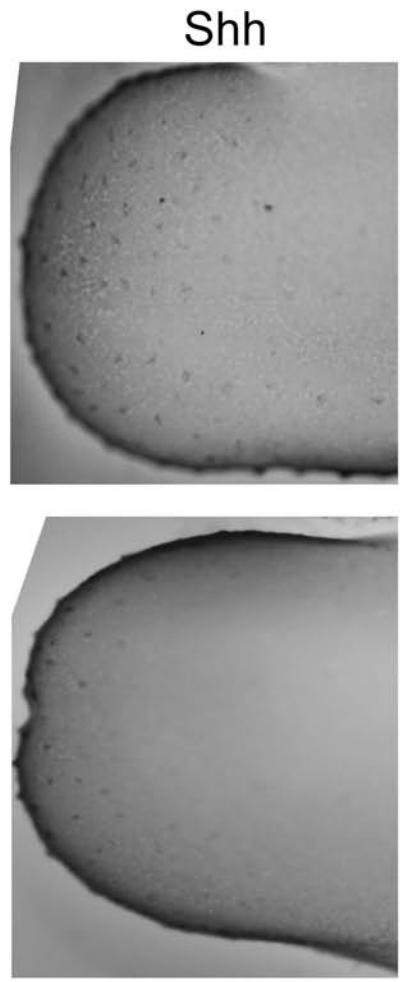**B**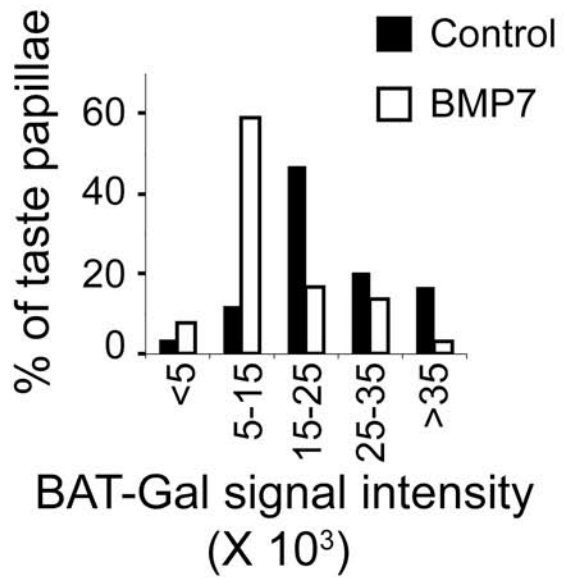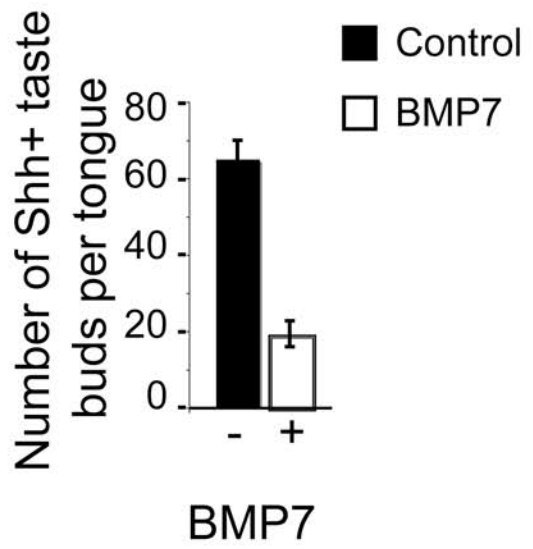

Supplement: dev030544-sup-030544-figs6.pdf [file dev030544-sup-030544-figs6.pdf]

**A**

Wildtype

*Bmp7*<sup>-/-</sup>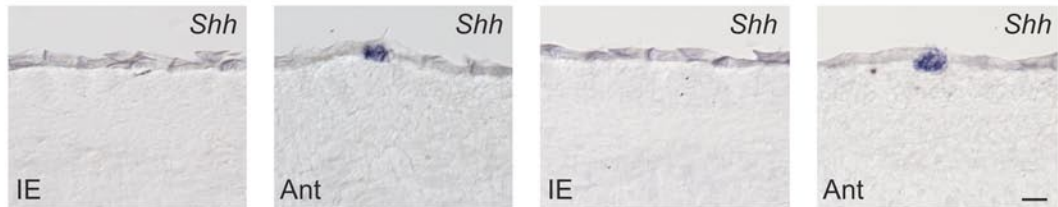**B**

Wildtype

*Bmp7*<sup>-/-</sup>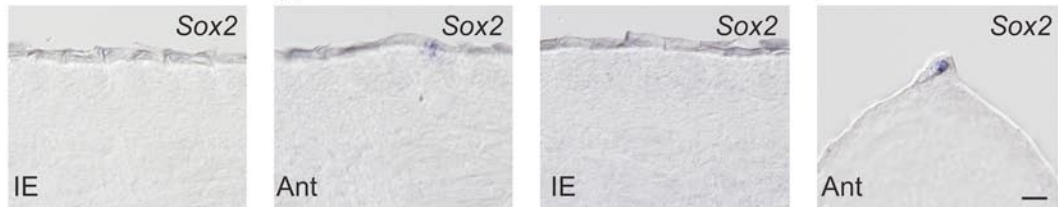

Supplement: dev030544-sup-030544-figs7.pdf [file dev030544-sup-030544-figs7.pdf]
